# Supplementary material for: Magnetic Field Action on Limnospira indica PCC8005 Cultures: Enhancement of Biomass Yield and Protein Content
Source: MDPI journal article supplement (doi:10.3390/app12031533), 2022-01-31
Supplement: s1 [file s1]

Table S1: Mapping of Magnetic Field intensities.

| Height 0 cm (z)    | y (cm) | x (cm) |       |       |                    |       |       |       |       |       |       |       |
|--------------------|--------|--------|-------|-------|--------------------|-------|-------|-------|-------|-------|-------|-------|
|                    |        | 0      | 1     | 2     | 3                  | 4     | 5     | 6     | 7     | 8     | 9     | 10    |
|                    |        | 0      | 9.52  | 10.87 | 10.9               | 11.17 | 11.36 | 11.11 | 11.61 | 10.34 | 9.51  | 8.60  |
|                    | 1      | 8.73   | 9.95  | 10.68 | 10.80              | 10.78 | 11.07 | 10.86 | 10.3  | 9.81  | 8.76  | 7.99  |
|                    | 2      | 8.36   | 9.29  | 9.85  | 10.24              | 10.53 | 10.72 | 10.96 | 10.12 | 8.84  | 8.00  | 6.78  |
|                    | 3      | 8.47   | 9.81  | 10.50 | 11.24              | 11.47 | 11.64 | 10.64 | 10.26 | 9.38  | 8.64  | 7.42  |
|                    | 4      | 8.89   | 9.74  | 10.36 | 10.76              | 11.62 | 11.28 | 11.51 | 10.93 | 10.26 | 9.36  | 7.50  |
|                    |        |        | Mean  | 9.96  | Standard deviation |       |       |       | 1.24  |       |       |       |
| Height 3.5 cm (z)  | y (cm) | x (cm) |       |       |                    |       |       |       |       |       |       |       |
|                    |        | 0      | 1     | 2     | 3                  | 4     | 5     | 6     | 7     | 8     | 9     | 10    |
|                    |        | 0      | 10.8  | 13.96 | 14.61              | 14.60 | 14.34 | 15.34 | 14.57 | 13.09 | 13.11 | nd    |
|                    | 1      | 12.1   | 12.59 | 14.10 | 13.88              | 13.95 | 13.06 | 13.54 | 12.73 | 11.62 | 10.77 | 8.26  |
|                    | 2      | 10.94  | 11.78 | 12.38 | 13.01              | 13.05 | 13.36 | 13.65 | 12.39 | 11.12 | 10.12 | 8.76  |
|                    | 3      | 10.11  | 11.19 | 12.06 | 12.49              | 13.02 | 13.07 | 12.71 | 11.97 | 11.07 | 10.15 | 8.74  |
|                    | 4      | 9.76   | 10.87 | 11.77 | 12.38              | 12.62 | 12.60 | 12.43 | 12.04 | 11.47 | 10.12 | 8.90  |
|                    |        |        | Mean  | 12.13 | Standard deviation |       |       |       | 1.65  |       |       |       |
| Height 7 cm (z)    | y (cm) | x (cm) |       |       |                    |       |       |       |       |       |       |       |
|                    |        | 0      | 1     | 2     | 3                  | 4     | 5     | 6     | 7     | 8     | 9     | 10    |
|                    |        | 0      | 11.61 | 13.79 | 14.88              | 16.14 | 16.00 | 15.20 | 14.90 | 15.60 | 13.00 | 12.01 |
|                    | 1      | 11.67  | 13.49 | 13.47 | 14.45              | 14.06 | 14.12 | 13.50 | 12.89 | 11.76 | 10.61 | 9.64  |
|                    | 2      | 10.70  | 12.04 | 12.54 | 13.24              | 13.41 | 13.61 | 13.80 | 12.80 | 11.85 | 11.08 | 9.27  |
|                    | 3      | 9.86   | 11.42 | 12.31 | 12.89              | 13.17 | 13.20 | 12.93 | 12.22 | 11.34 | 10.30 | 9.08  |
|                    | 4      | 10.17  | 11.50 | 12.08 | 12.62              | 12.96 | 12.84 | 12.68 | 12.05 | 11.03 | 10.00 | 8.78  |
|                    |        |        | Mean  | 12.42 | Standard deviation |       |       |       | 1.73  |       |       |       |
| Height 10.5 cm (z) | y (cm) | x (cm) |       |       |                    |       |       |       |       |       |       |       |
|                    |        | 0      | 1     | 2     | 3                  | 4     | 5     | 6     | 7     | 8     | 9     | 10    |
|                    |        | 0      | 9.50  | 12.84 | 14.43              | 14.37 | 15.11 | 14.76 | 14.65 | 14.22 | 14.10 | 13.61 |
|                    | 1      | 10.39  | 11.6  | 12.77 | 14.09              | 13.81 | 13.71 | 14.00 | 13.69 | 12.92 | 12.22 | 9.92  |
|                    | 2      | 9.83   | 11.55 | 11.9  | 12.52              | 12.69 | 12.86 | 13.10 | 11.92 | 11.11 | 9.72  | 8.74  |
|                    | 3      | 9.37   | 10.82 | 11.73 | 11.86              | 12.43 | 12.42 | 12.37 | 11.61 | 11.01 | 9.57  | 8.43  |
|                    | 4      | 9.02   | 10.3  | 11.04 | 12.20              | 12.44 | 12.56 | 12.24 | 11.55 | 10.76 | 9.60  | 8.33  |
|                    |        |        | Mean  | 11.93 | Standard deviation |       |       |       | 1.76  |       |       |       |
| Height 14 cm (z)   | y (cm) | x (cm) |       |       |                    |       |       |       |       |       |       |       |
|                    |        | 0      | 1     | 2     | 3                  | 4     | 5     | 6     | 7     | 8     | 9     | 10    |
|                    |        | 0      | 8.63  | 10.39 | 10.22              | 11.74 | 12.73 | 12.80 | 12.13 | 11.36 | 10.49 | 8.47  |
|                    | 1      | 7.34   | 8.71  | 9.79  | 9.20               | 9.42  | 9.41  | 9.43  | 8.84  | 8.08  | 7.17  | 6.17  |
|                    | 2      | 7.13   | 8.09  | 8.86  | 9.46               | 9.83  | 9.48  | 9.12  | 8.68  | 7.80  | 6.64  | 5.62  |
|                    | 3      | 6.60   | 7.85  | 8.33  | 8.84               | 8.63  | 9.36  | 9.06  | 8.54  | 7.71  | 6.77  | 5.60  |
|                    | 4      | 6.86   | 7.93  | 8.48  | 9.68               | 9.48  | 9.76  | 9.52  | 9.17  | 8.44  | 7.32  | 5.91  |
|                    |        |        | Mean  | 8.73  | Standard deviation |       |       |       | 1.63  |       |       |       |
